# Supplementary material for: Resistive crack-based nanoparticle strain sensors with extreme sensitivity and adjustable gauge factor, made on flexible substrates
Source: Royal Society of Chemistry journal article supplement (doi:10.1039/d0nr07002e), 2021-01-01
Supplement: d0nr07002e4.pdf [file d0nr07002e4.pdf]

## Resistive crack-based nanoparticle strain sensors with extreme sensitivity and adjustable gauge factor made on flexible substrates

Evangelos Aslanidis,<sup>\*a</sup> Evangelos Skotadis<sup>a</sup> and Dimitris Tsoukalas<sup>a</sup>

### Calculation of strain from the bending angle

Figure 1 shows a graphic representation of a bended substrate. Tensile and compressive stresses will be applied to the substrate causing the upper surface to increase their distance from  $l_0$  to  $l'$ . Uniform substrates remain unstrained at their medium ( $l_0$  in Figure S1).

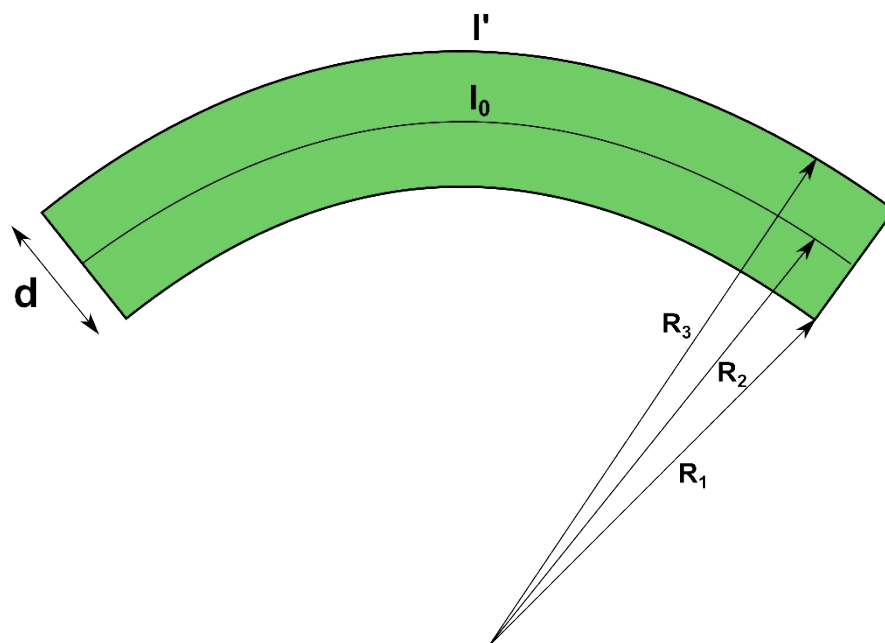

Figure S1: Schematic representation of a bended substrate with  $d$  thickness.

The distance  $l_0$  is given by the following equation:

$$l_0 = R_2\theta \quad (1)$$

Where  $\theta$  is the angle corresponding angle of the arc length. The distance  $l'$  can be calculated by the equation:

$$l' = \left(R_2 + \frac{d}{2}\right)\theta \quad (2)$$

The definition of strain is:

$$\varepsilon = \frac{l' - l_0}{l_0} \quad (3)$$

And by applying (1) and (2) to (3):

$$\varepsilon = \frac{\left(R_2 + \frac{d}{2}\right)\theta - R_2\theta}{R_2\theta} = \frac{d}{2R_2}$$

$$\varepsilon = \frac{d}{2R_2} \quad (4)$$

Since radials  $R_1$   $R_2$   $R_3$  are much larger than the thickness  $d$  it can be therefore assumed that they are all equal to  $R_2$ , aif the sensor is bent according to what can be seen in Figure S2.

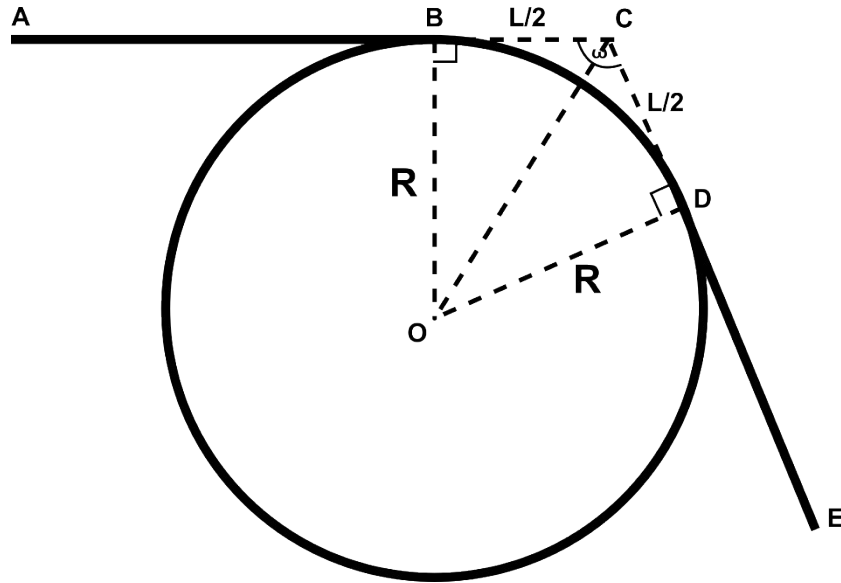

Figure S2: Schematic representation of the bended sensor and the circle with radius equal with the bended radius. The strain-sensor extends from point A to point B, and can be bent according to the bending angle  $\omega$

As can be seen in Figure S2, the sensor can be deformed between two fixed points B and D. The distance between B and D when no bending occurs equals to  $L$ , which in our case is  $3000\mu\text{m}$ . Therefore, the overall distance of the two straight sections BC and CD is  $L$ . In addition, the straight section OC bisects the angle  $\omega$  and the angle BOD. The schematic representation in Figure S2 shows the circle with a radius equal to the bending radius  $R$ . The radius  $R$  can be calculated by the following equation:

$$R = \frac{L}{2\cot\left(\frac{\omega}{2}\right)} \quad (5)$$

By applying the equation (5) to equation (4):

$$\varepsilon = \frac{d\cot\left(\frac{\omega}{2}\right)}{L} \quad (6)$$
